# Supplementary material
Source: Royal Society of Chemistry journal article supplement (doi:10.1039/d6lf00061d)
Supplement: d6lf00061d1.pdf [file d6lf00061d1.pdf]

## *Supporting Information*

# **Programmable Shrinking and Aggregation of pH-Thermo Dual-Responsive Amphiphilic Polymeric Nanoparticles Governed by Molecular Architecture**

*Giuseppe Nunziata, Mattia Sponchioni \* and Filippo Rossi \**

*Department of Chemistry, Materials and Chemical Engineering “Giulio Natta”, Politecnico di Milano,  
piazza Leonardo da Vinci 32, 20133, Milan, Italy*

\* corresponding authors

E-mail: [mattia.sponchioni@polimi.it](mailto:mattia.sponchioni@polimi.it)

[filippo.rossi@polimi.it](mailto:filippo.rossi@polimi.it)

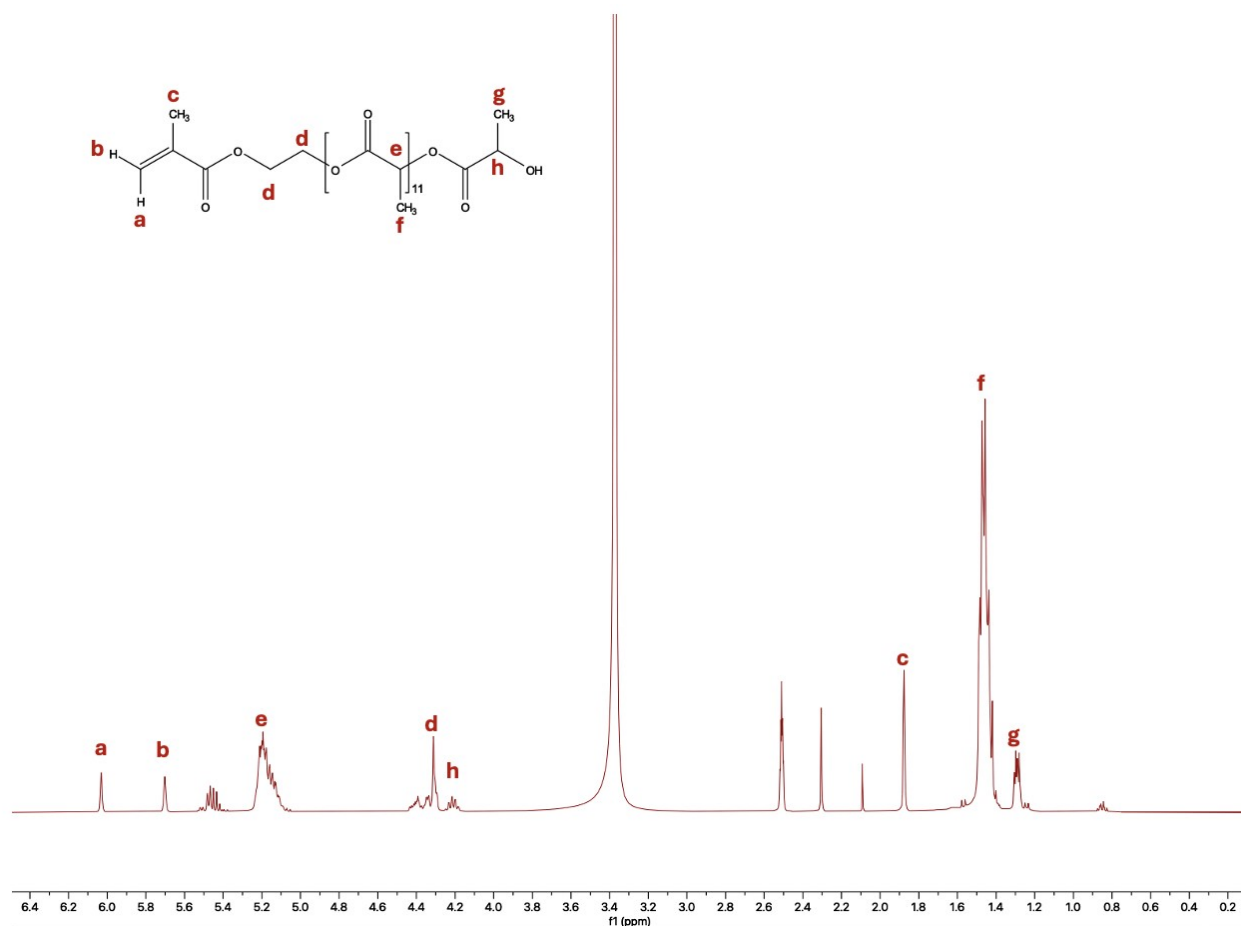

**Figure S1.**  $^1\text{H}$  NMR spectrum of the HEMA-graft- $\text{LA}_{12}$  macromonomer (400 MHz,  $\text{DMSO-d}_6$ ) with peak assignments. The characteristic signals of the PLA backbone ( $-\text{CH}-$  at  $\sim 5.2$  ppm and  $-\text{CH}_3$  at  $\sim 1.5$  ppm) confirm the successful ring-opening polymerization of D,L-lactide. The presence of the vinyl protons of the methacrylate group ( $\sim 6.1$  and  $\sim 5.6$  ppm) demonstrates the preservation of the polymerizable end-group, enabling subsequent RAFT chain extension. Signals in the 4.3–4.1 ppm region are attributed to the  $-\text{O}-\text{CH}_2-$  groups of the HEMA linker, further supporting the expected macromolecular structure.

$^1\text{H}$  NMR (400 MHz,  $\text{DMSO-d}_6$ ):  $\delta$  (ppm) = 6.03 (a,  $\text{CH}_2=$ ), 5.70 (b,  $\text{CH}=\text{}$ ), 5.19 (e,  $-\text{CH}-$  PLA), 4.31 (d,  $-\text{O}-\text{CH}_2-$ ), 4.21 (h,  $-\text{CH}-\text{OH}$ ), 1.87 (c,  $=\text{C}-\text{CH}_3$ ), 1.46 (f,  $-\text{CH}_3$  PLA), 1.29 (g,  $-\text{CH}_3$ ).

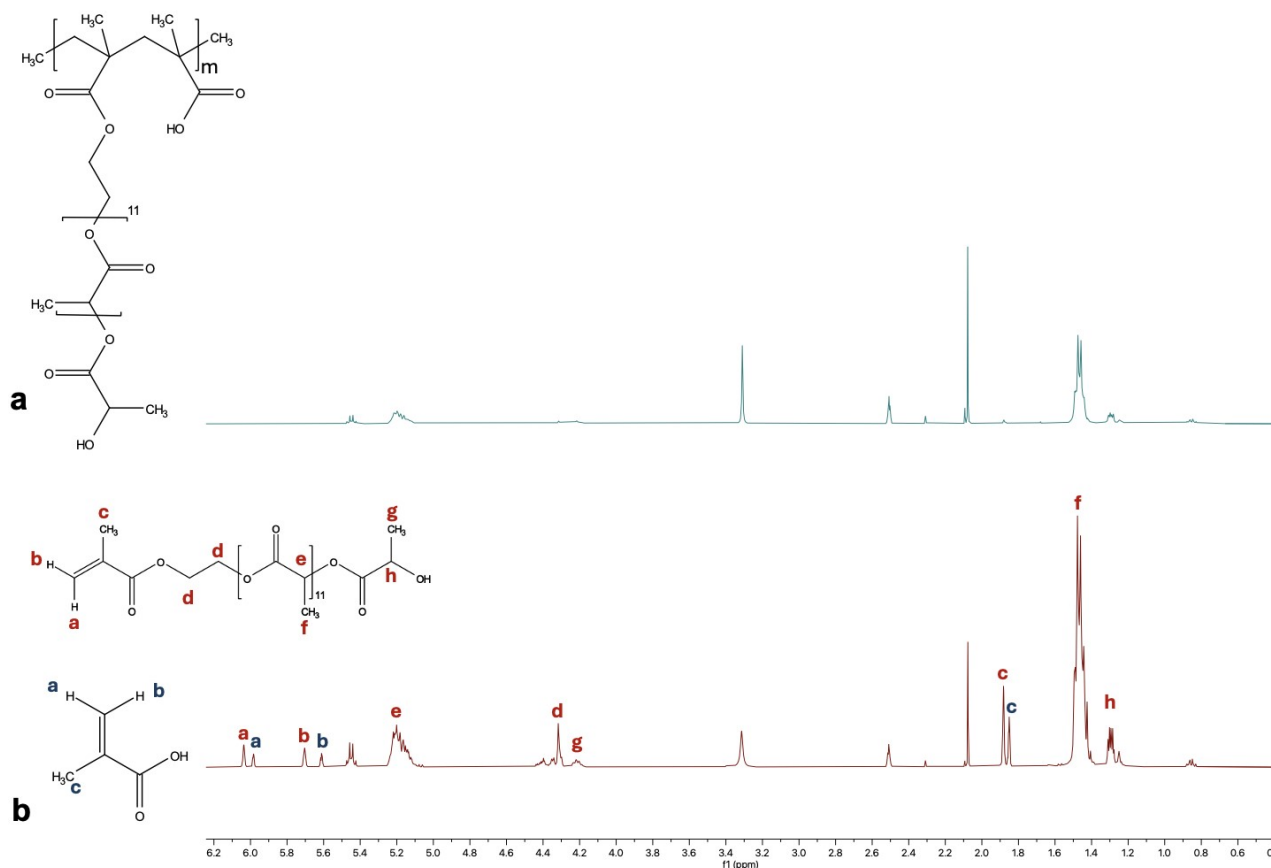

**Figure S2.**  $^1\text{H}$  NMR spectra (400 MHz,  $\text{DMSO-d}_6$ ) of the  $\text{P}((\text{HEMA-graft-LA}_{12})\text{-co-MAA})$  copolymer compared with the corresponding monomers. **(a)** Final copolymer obtained after RAFT polymerization at 24 h. **(b)** Mixture of HEMA-graft- $\text{LA}_{12}$  and methacrylic acid (MAA) monomers at 0h. The disappearance of the characteristic vinyl proton signals of the methacrylate groups ( $\sim 6.0\text{--}5.5$  ppm) in the copolymer spectrum confirms successful monomer conversion during the RAFT process. Concurrently, the appearance of broadened signals associated with the polymer backbone and side chains (e.g., PLA  $-\text{CH}-$  at  $\sim 5.2$  ppm and  $-\text{CH}_3$  at  $\sim 1.5$  ppm) supports the formation of the statistical copolymer.

$^1\text{H}$  NMR (400 MHz,  $\text{DMSO-d}_6$ ):  $\delta$  (ppm) = 6.03 (a (red),  $\text{CH}_2=$ ), 5.98 (a (blue),  $\text{CH}=\text{}$ ), 5.70 (b (red),  $\text{CH}=\text{}$ ), 5.61 (b (blue),  $\text{CH}=\text{}$ ), 5.19 (e,  $-\text{CH}-$  PLA), 4.31 (d,  $-\text{O}-\text{CH}_2-$ ), 4.21 (h,  $-\text{CH}-\text{OH}$ ), 1.87 (c (red),  $=\text{C}-\text{CH}_3$ ), 1.81 (c (blue),  $=\text{C}-\text{CH}_3$ ), 1.46 (f,  $-\text{CH}_3$  PLA), 1.29 (g,  $-\text{CH}_3$ ).

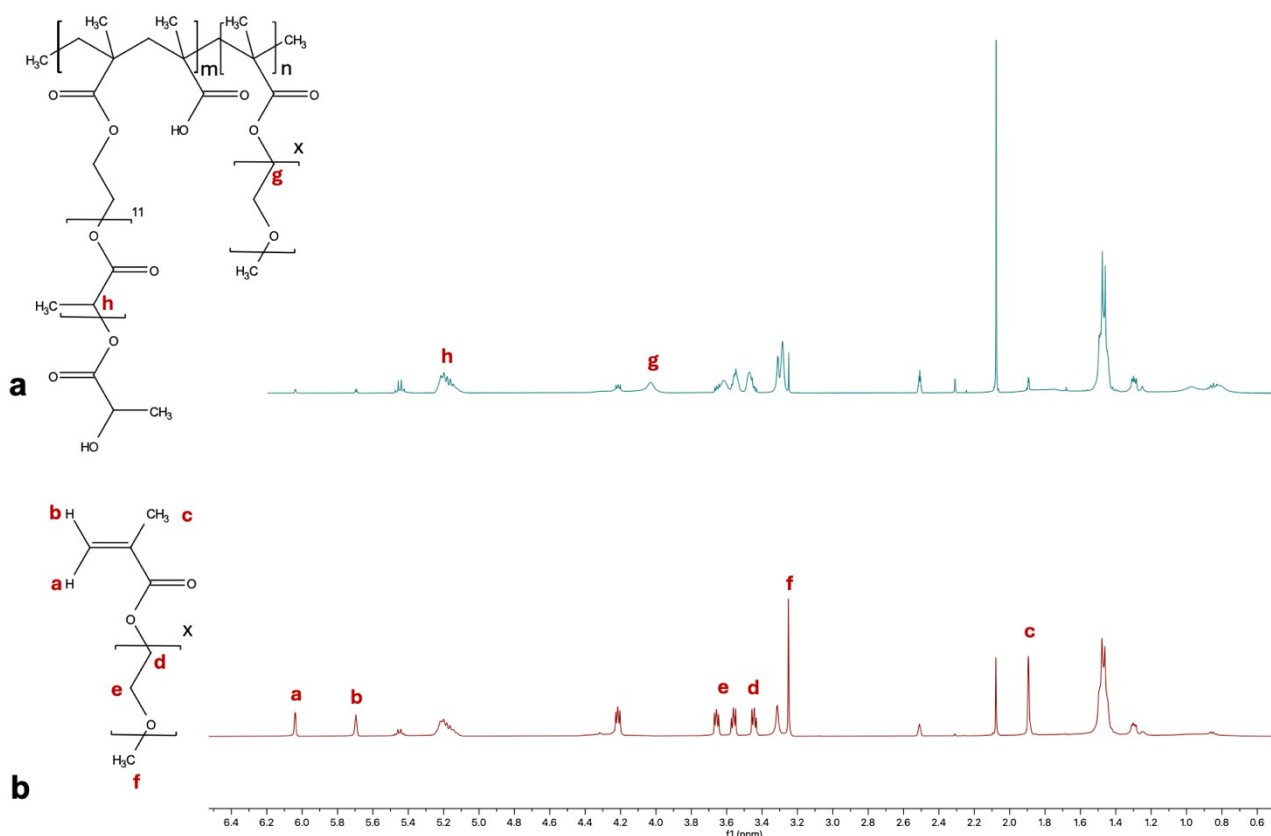

**Figure S3.**  $^1\text{H}$  NMR spectra (400 MHz,  $\text{DMSO-d}_6$ ) of the final  $\text{P}((\text{HEMA-graft-LA}_{12})\text{-co-MAA})\text{-b-P}(\text{EG}_2\text{MA-co-EG}_8\text{MA})$  block copolymer compared with the corresponding thermo-responsive monomers. (a) Final block copolymer obtained after RAFT chain extension. (b) Mixture of  $\text{EG}_2\text{MA}$  and  $\text{EG}_8\text{MA}$  monomers. The disappearance of the characteristic vinyl proton signals of the methacrylate groups ( $\sim 6.0\text{--}5.5$  ppm) in the copolymer spectrum confirms efficient monomer conversion during the chain extension step. The appearance of broad signals in the  $4.2\text{--}3.5$  ppm region, attributed to the oligo(ethylene glycol) side chains, together with the preserved signals of the PLA backbone ( $\sim 5.2$  and  $\sim 1.5$  ppm), confirms the successful formation of the amphiphilic block copolymer. These spectral features demonstrate the effective incorporation of the thermo-responsive EGMA block while retaining the structural integrity of the initial macro-CTA.

$^1\text{H}$  NMR (400 MHz,  $\text{DMSO-d}_6$ ):  $\delta$  (ppm) = 6.03 (a,  $\text{CH}_2=$ ), 5.70 (b (red),  $\text{CH}=\text{}$ ), 5.61 (b,  $\text{CH}=\text{}$ ), 5.19 (h,  $-\text{CH}-\text{PLA}$ ), 4.02 (g,  $-\text{COO}-\text{CH}_2-$ ), 3.56 (e,  $-\text{O}-\text{CH}_2-$ ), 3.44 (d,  $-\text{CH}_2-\text{O}$ ), 3.25 (f,  $-\text{CH}-\text{OH}$ ), 1.89 (c,  $=\text{C}-\text{CH}_3$ ).

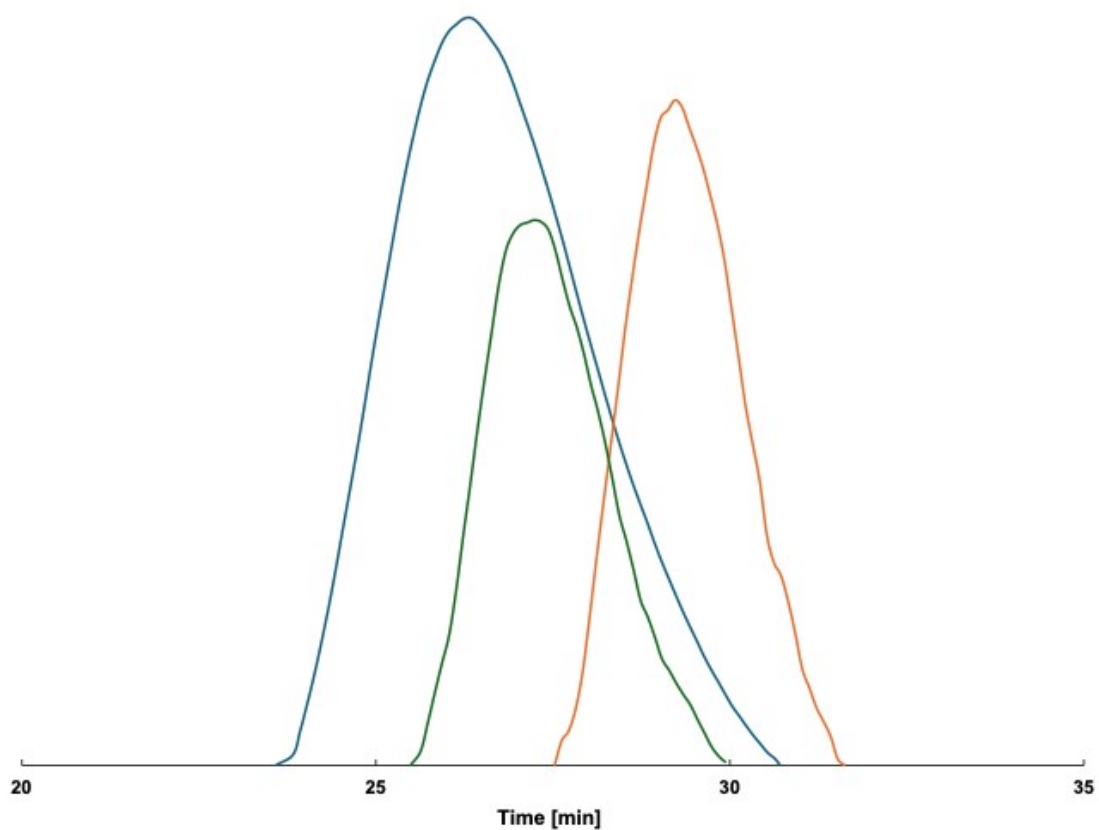

**Figure S4.** GPC chromatograms with relative retention time (dotted line) of P((HEMA-graft-LA<sub>12</sub>)-co-MAA)-b-P(EG<sub>2</sub>MA-co-EG<sub>8</sub>MA) (blue), P((HEMA-graft-LA<sub>12</sub>)-co-MAA) (green) and HEMA-graft-LA<sub>12</sub> (orange) with an unimodal and narrow molecular weight distribution.

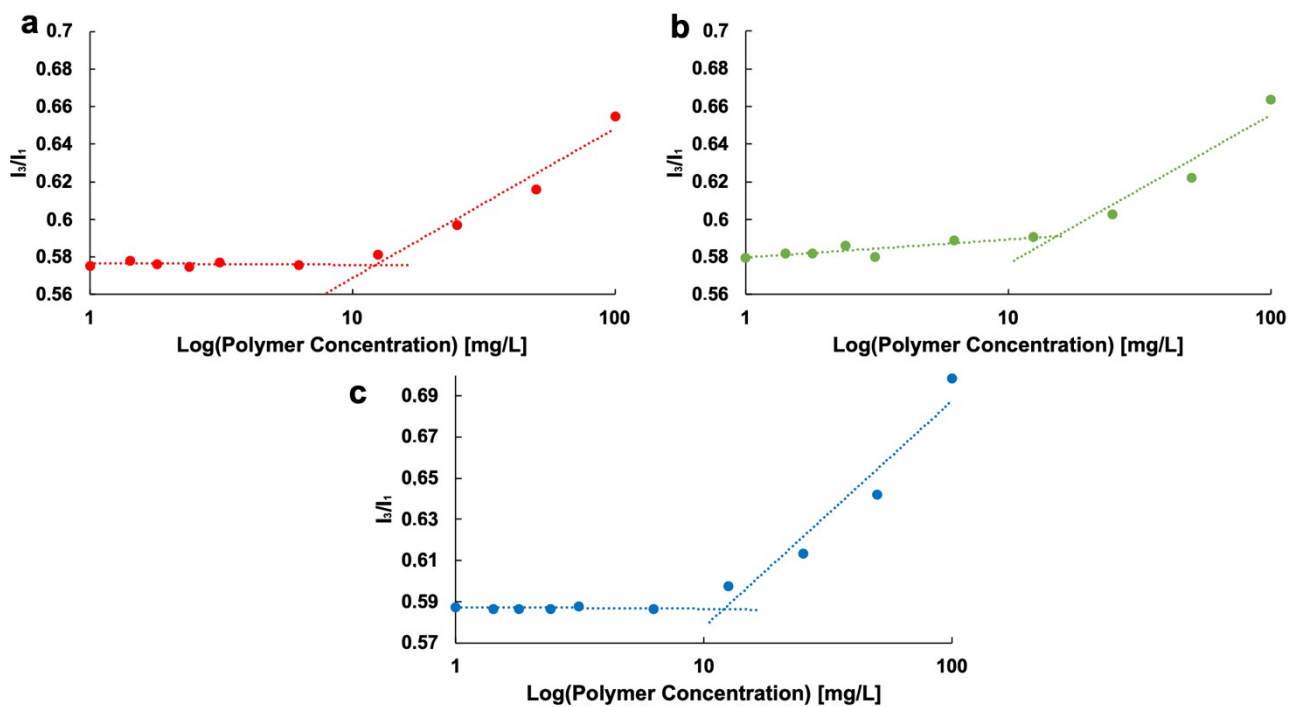

**Figure S5.** Determination of the CMC of nanoparticle formulations using pyrene as hydrophobic fluorescent probe. The ratio between the third and first vibronic emission peaks ( $I_3 = 384 \text{ nm}/I_1 = 373 \text{ nm}$ ) is plotted as a function of the logarithm of polymer concentration. Each panel corresponds to a different formulation: (a) sample A (red circles), (b) sample B (green circles), (c) sample C (blue circles).

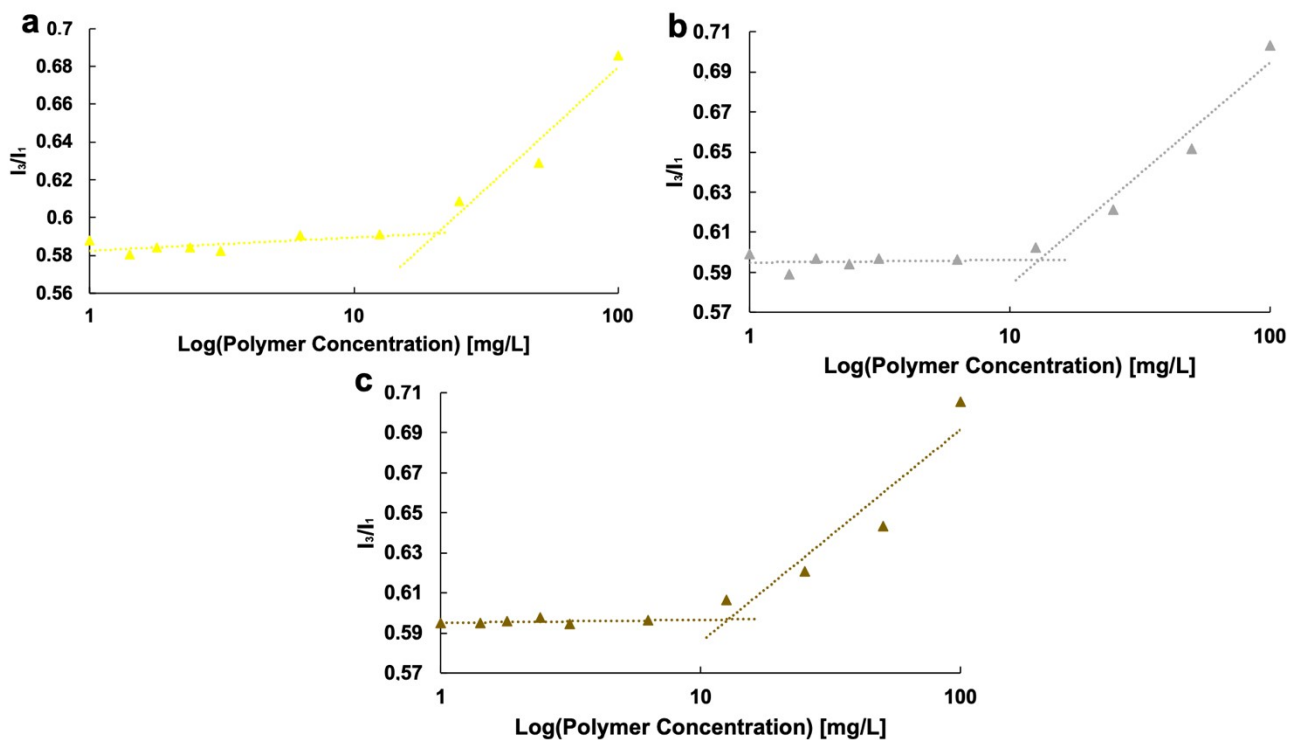

**Figure S6.** Determination of the CMC of nanoparticle formulations using pyrene as hydrophobic fluorescent probe. The ratio between the third and first vibronic emission peaks ( $I_3 = 384 \text{ nm}/I_1 = 373 \text{ nm}$ ) is plotted as a function of the logarithm of polymer concentration. Each panel corresponds to a different formulation: (a) sample D (yellow triangles), (b) sample E (grey triangles), (c) sample F (brown triangles).

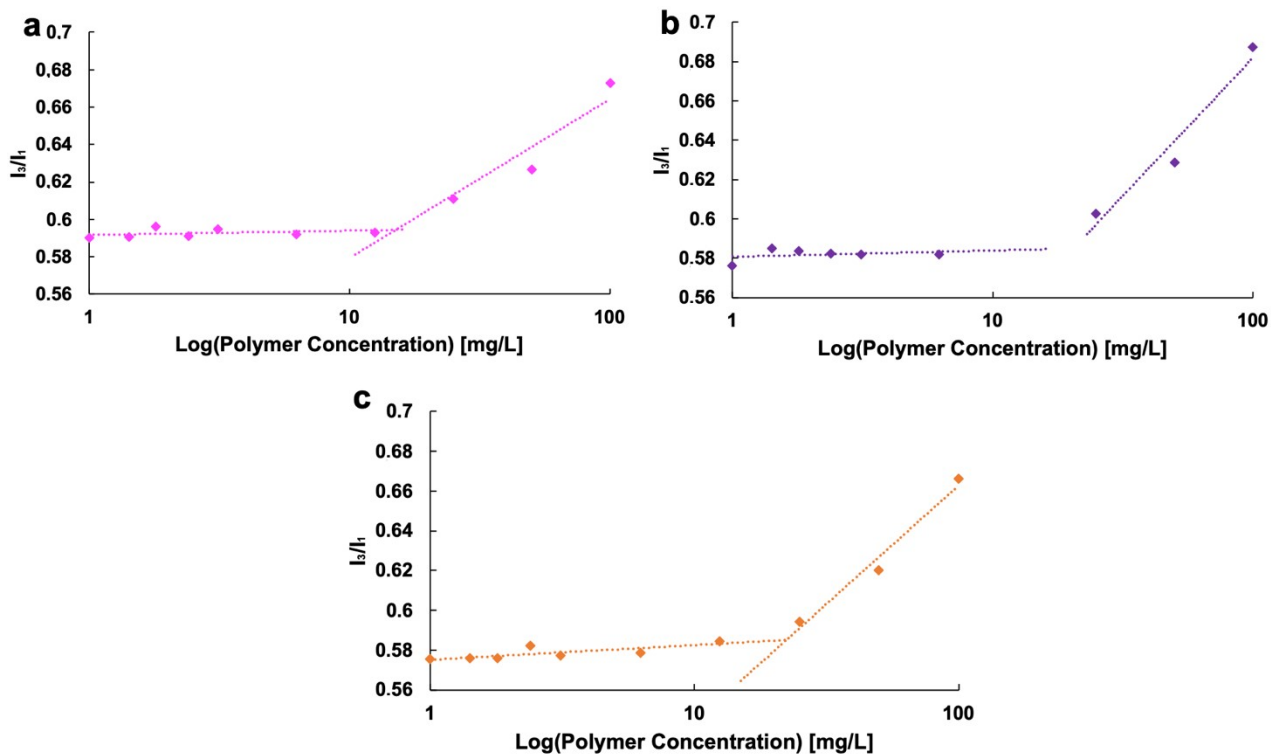

**Figure S7.** Determination of the CMC of nanoparticle formulations using pyrene as hydrophobic fluorescent probe. The ratio between the third and first vibronic emission peaks ( $I_3 = 384 \text{ nm}/I_1 = 373 \text{ nm}$ ) is plotted as a function of the logarithm of polymer concentration. Each panel corresponds to a different formulation: (a) sample G (fuchsia diamond), (b) sample H (purple diamond), (c) sample I (orange diamond).

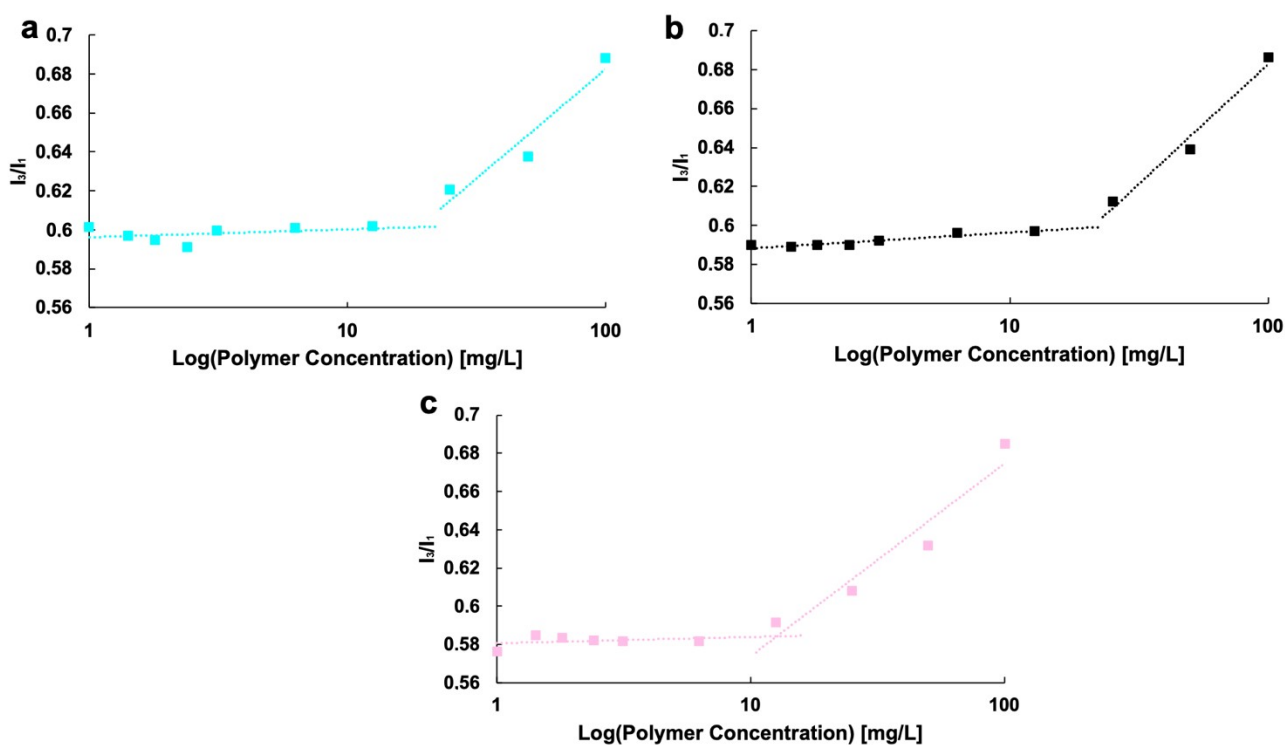

**Figure S8.** Determination of the CMC of nanoparticle formulations using pyrene as hydrophobic fluorescent probe. The ratio between the third and first vibronic emission peaks ( $I_3 = 384 \text{ nm}/I_1 = 373 \text{ nm}$ ) is plotted as a function of the logarithm of polymer concentration. Each panel corresponds to a different formulation: (a) sample J (cyan square), (b) sample K (black square), (c) sample L (pink square).

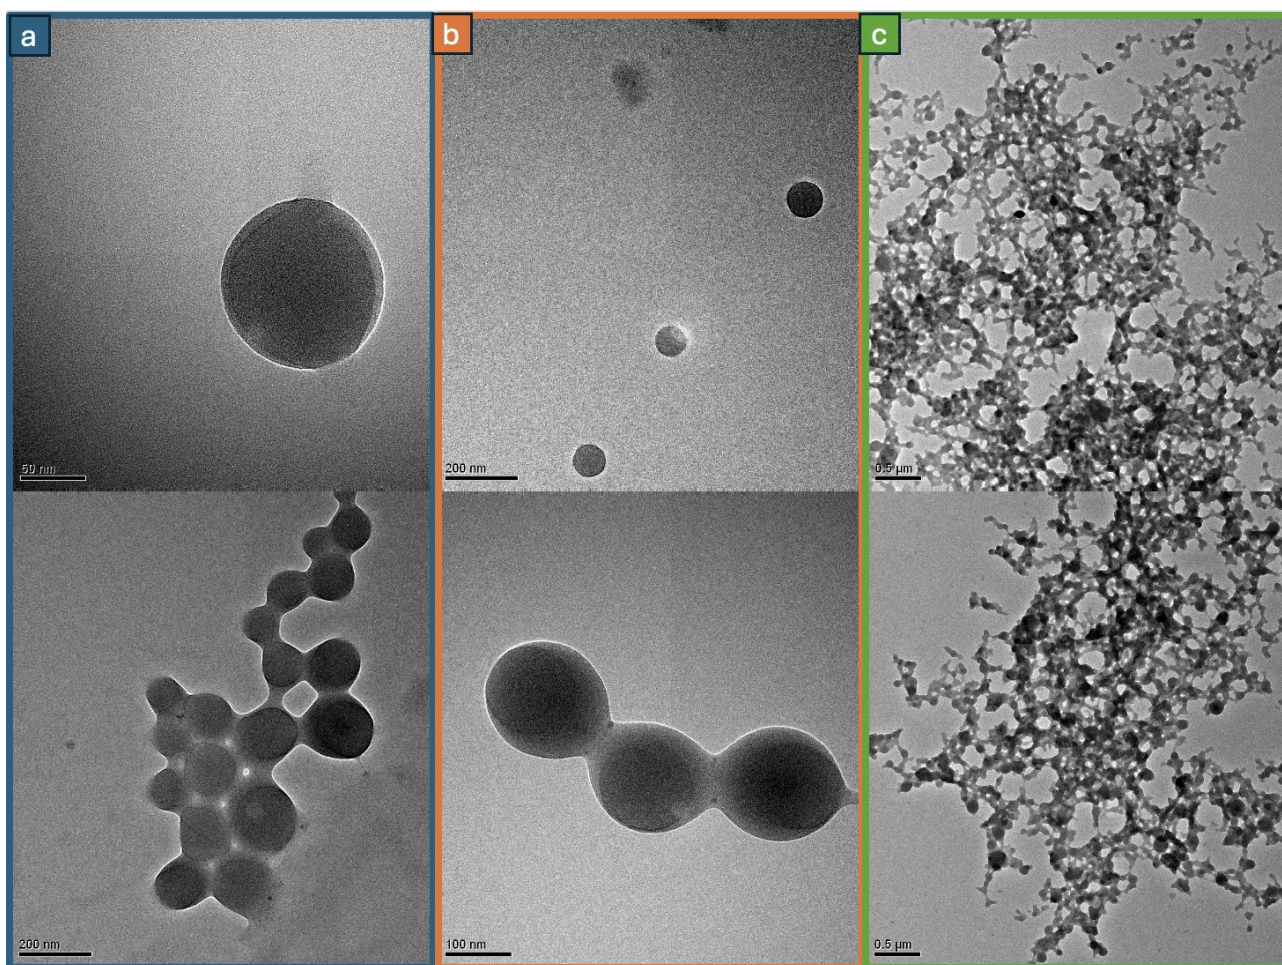

**Figure S9.** TEM images of representative nanoparticles prepared from sample E under different conditions: (a) room temperature, (b) after thermal treatment at 45 °C, and (c) after exposure to acidic conditions (pH 3). At room temperature, nanoparticles display a well-defined morphology. After thermal treatment, particles remain distinguishable, supporting the preservation of nanoparticle identity upon heating. Under acidic conditions, extended aggregated structures are observed, consistent with pH-induced colloidal destabilization.

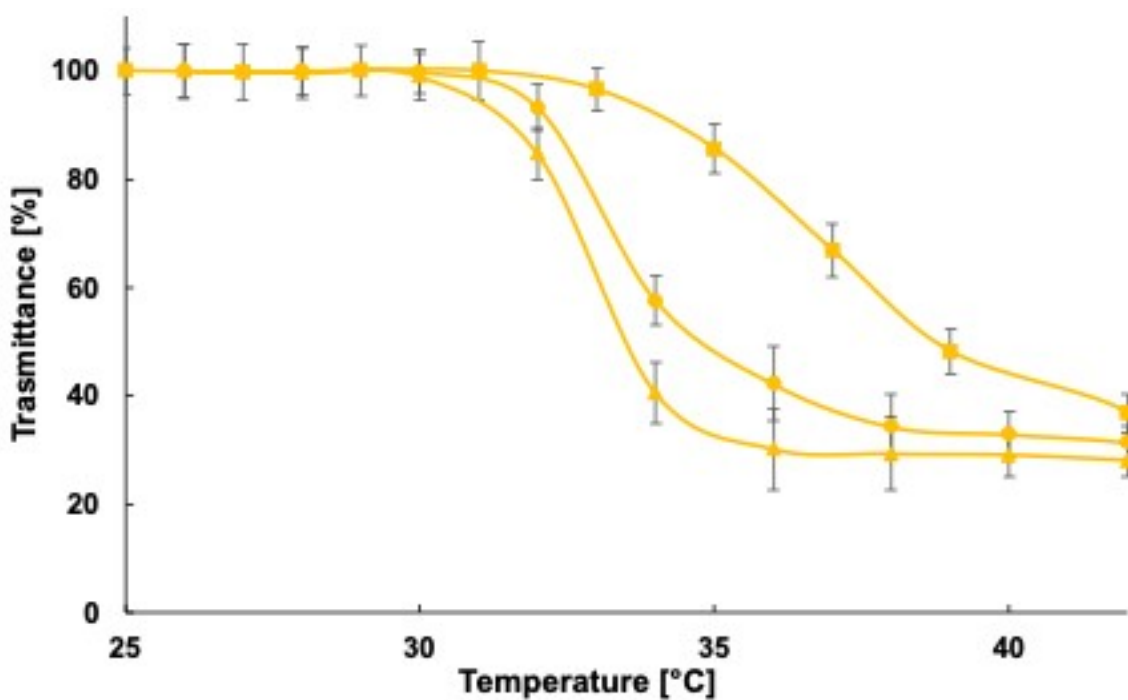

**Figure S10.** Temperature-dependent optical transmittance UV-vis of nanoparticle formulations J–L. A marked decrease in transmittance is observed above the critical temperature, indicating increased turbidity due to thermally induced nanoparticle aggregation. This behavior is consistent with the aggregation-driven increase in hydrodynamic diameter measured by DLS. Shape code: J (circles), K (squares), and L (triangles).

## NMR-based calculation of monomer conversion and number-average molecular weight

The experimental degree of polymerization and the number-average molecular weight  $M_n$  of the HEMA-graft-LA<sub>12</sub> macromonomer after ROP was estimated by <sup>1</sup>H NMR end-group analysis, using the integration ratio between the PLA methyl signal and the methacrylate vinyl proton signal (Figure S1) according to:

$$DP_{LA_{12}} = \frac{e_{peak\ area}}{a_{peak\ area}} + 1 \quad (S1)$$

$$Mn_{LA_{12}} = Mn_{HEMA} + Mn_{LA} \times DP_{LA_{12}} \quad (S2)$$

where  $Mn_{HEMA}$  and  $Mn_{LA}$  are the molecular weights of HEMA and lactic acid repeating units, respectively.  $e_{peak\ area}$  and  $a_{peak\ area}$  correspond to the integrated areas of peaks e and a, respectively, as indicated in Figure S1.

The experimental degrees of polymerization of HEMA-graft-LA<sub>12</sub> and MAA in the first RAFT polymerization to synthesize P((HEMA-graft-LA<sub>12</sub>)-co-MAA) statistical copolymers, together with the corresponding number-average molecular weight, were calculated according to:

$$DP_{HEMA-graft-LA_{12}} = DP_{T-HEMA-LA_{12}} \times \chi_{HEMA-graft-LA_{12}} \quad (S3)$$

$$Mn_{HEMA-graft-LA_{12}} = Mn_{LA_{12}} \times DP_{HEMA-graft-LA_{12}} \quad (S4)$$

$$DP_{MAA} = DP_{T-MAA} \times \chi_{MAA} \quad (S5)$$

$$Mn_{MAA} = Mn_{MAA} \times DP_{MAA} \quad (S6)$$

$$Mn_{(HEMA-graft-LA_{12})-co-MAA} = Mn_{HEMA-graft-LA_{12}} + Mn_{MAA} \quad (S7)$$

Where  $DP_{T-HEMA-LA_{12}}$  and  $DP_{T-MAA}$  are the theoretical degrees of polymerization targeted from the monomer-to-CTA feed ratio for HEMA-graft- $LA_{12}$  and MAA, respectively.  $DP_{HEMA-graft-LA_{12}}$  and  $DP_{MAA}$  are the corresponding experimental degrees of polymerization calculated from the monomer conversions.  $Mn_{LA_{12}}$  is the number-average molecular weight of the HEMA-graft- $LA_{12}$  macromonomer determined by  $^1H$  NMR end-group analysis (see Equation S2),  $Mn_{MAA}$  is the molecular weight of methacrylic acid, and  $Mn_{CTA}$  is the molecular weight of the RAFT agent.

$\chi_{HEMA-graft-LA_{12}}$  and  $\chi_{MAA}$  are the fractional monomer conversions determined by  $^1H$  NMR:

$$\chi_{HEMA-graft-LA_{12}} = \left(1 - \frac{a_{RED\ peak\ area\ t}}{e_{RED\ peak\ area\ t}}\right) \times 100 \quad (S8)$$

$$\chi_{MAA} = \left(1 - \frac{a_{BLUE\ peak\ area\ t}}{e_{BLUE\ peak\ area\ t}}\right) \times 100 \quad (S9)$$

Where  $a_{RED\ peak\ area\ t}$  and  $a_{BLUE\ peak\ area\ t}$  are the integrated areas of the characteristic vinyl proton signals of HEMA-graft- $LA_{12}$  and MAA at time ( $t=24$ ), respectively, and  $e_{RED\ peak\ area\ t}$  and  $e_{BLUE\ peak\ area\ t}$  are the integrated areas of the characteristic PLA methyl signal at time ( $t=24$ ) (Figure S2). The corresponding conversion values are reported in Table 2.

The experimental degree of polymerization of the EGMA-based block was calculated according to:

$$DP_{EGMA_n} = DP_{HEMA-graft-LA_{12}} \times DP_{LA_{12}} \times \left(\frac{g_{peak\ area\ t}}{2h_{peak\ area\ t}}\right) \quad (S10)$$

$$DP_{EG_8MA} = \frac{DP_{T-EG_8MA}}{DP_{T-EG_2MA} + DP_{T-EG_8MA}} \times DP_{EGMA_n} \quad (S11)$$

$$DP_{EG_2MA} = \frac{DP_{T-EG_2MA}}{DP_{T-EG_2MA} + DP_{T-EG_8MA}} \times DP_{EGMA_n} \quad (S12)$$

$$Mn_{EG_8MA} = Mn_{T-EG_8MA} \times DP_{EG_8MA} \quad (S13)$$

$$Mn_{EG_2MA} = Mn_{T-EG_2MA} \times DP_{EG_2MA} \quad (S14)$$

$$Mn_{EGMA_n} = Mn_{EG_2MA} + Mn_{EG_8MA} \quad (S15)$$

Where  $DP_{HEMA-graft-LA_{12}}$  is the degree of polymerization of HEMA-graft-LA<sub>12</sub> units in the final copolymer,  $DP_{LA_{12}}$  is the average number of lactic acid units per PLA graft,  $g_{peak\ area\ t}$  is the integrated area of the EGMA ester methylene protons (4.02 ppm, -COOCH<sub>2</sub>-) and  $h_{peak\ area\ t}$  is the integrated area of the PLA methyl signal used as reference (Figure S3). The factor 2 accounts for the two protons of the EGMA ester methylene group. Because the resonances of EG<sub>2</sub>MA and EG<sub>8</sub>MA strongly overlap in the final copolymers, the individual contributions of the two monomers could not be reliably resolved by <sup>1</sup>H NMR.

Therefore, the total experimental degree of polymerization of the EGMA-based block was first calculated from the integrated EGMA signal, and the individual  $DP_{EG_2MA}$  and  $DP_{EG_8MA}$  values were then estimated by partitioning  $DP_{EG_nMA}$  according to the theoretical DP of EG<sub>2</sub>MA and EG<sub>8</sub>MA in the feed ( $DP_{T-EG_2MA}$  and  $DP_{T-EG_8MA}$ ).  $Mn_{T-EG_2MA}$  and  $Mn_{T-EG_8MA}$  are the molecular weights of the monomers EG<sub>2</sub>MA and EG<sub>8</sub>MA. For the RAFT chain extension with EG<sub>2</sub>MA and EG<sub>8</sub>MA, the overall monomer conversion  $\chi_{EGMA_n}$  was calculated from the decrease of the methacrylate vinyl proton signal over time:

$$\chi_{EGMA_n} = \left(1 - \frac{a_{peak\ area\ t}}{e_{peak\ area\ t}}\right) \times 100 \quad (S16)$$

Where  $a_{peak\ area\ t}$  is the integrated area of the characteristic vinyl proton signal of EGMA<sub>n</sub> at time (t=24), and  $e_{peak\ area\ t}$  are the integrated areas of the characteristic PLA methyl signal at time (t=24) (Figure S3). The corresponding conversion values are reported in Table 2.
